# Errata

Räikkönen K, Matthews KA, Kuller LH: Depressive symptoms and stressful life events predict metabolic syndrome among middle-aged women: a comparison of World Health Organization, Adult Treatment Panel III, and International Diabetes Foundation definitions. *Diabetes Care* 30:872–877, 2007

Table 1 in the above-listed article inaccurately reported several of the clinical criteria for the metabolic syndrome. The analyses reported in the article were not based on the inaccurate values for Table 1 but were based on the correct criteria. All reported results, therefore, are correct. The correct table appears below.

Table 1—Clinical criteria for the metabolic syndrome

| Components      | WHO: fasting glucose above cutoff or taking medication for diabetes in combination with any two of the listed components | ATP III: any three of the listed components       | IDF: waist circumference above cutoff in combination with any two of the listed components |
|-----------------|--------------------------------------------------------------------------------------------------------------------------|---------------------------------------------------|--------------------------------------------------------------------------------------------|
| Fasting glucose | 1) $\geq 110$ mg/dl*                                                                                                     | 1) $\geq 100$ mg/dl*                              | 1) $\geq 100$ mg/dl*                                                                       |
| Triglycerides   | 2) $\geq 150$ mg/dl                                                                                                      | 2) $\geq 150$ mg/dl*                              | 2) $> 150$ mg/dl*                                                                          |
| HDL cholesterol | 3) $< 39$ mg/dl                                                                                                          | 3) $< 50$ mg/dl*                                  | 3) $< 50$ mg/dl*                                                                           |
| Obesity         | 4) BMI $> 30$ kg/m <sup>2</sup> or waist-to-hip ratio $> 0.85$                                                           | 4) Waist circumference $\geq 88$ cm               | 4) Waist circumference $\geq 80$ cm†                                                       |
| Blood pressure  | 5) SBP $\geq 140$ mmHg and/or DBP $\geq 90$ mmHg*                                                                        | 5) SBP $\geq 130$ mmHg and/or DBP $\geq 85$ mmHg* | 5) SBP $\geq 130$ mmHg and/or DBP $\geq 85$ mmHg*                                          |

\*Fulfillment of the cutoff score if alternatively taking medication for diabetes, dyslipidemia, or hypertension; microalbuminuria was not available when defining the metabolic syndrome via the WHO clinical criteria. †Criterion was ethnic specific; sample was primarily non-Hispanic Caucasian. DBP, diastolic blood pressure; SBP, systolic blood pressure.
